# Supplementary material for: Cancer Genetics Education in a Low- to Middle-Income Country: Evaluation of an Interactive Workshop for Clinicians in Kenya
Source: PubMed Central journal article supplement (PMC4452713; doi:10.1371/journal.pone.0129852), 2015-06-02

# Retinoblastoma Genetics Workshop

Helen Dimaras, PhD

13 September 2013  
6<sup>th</sup> Annual KNRbS Meeting

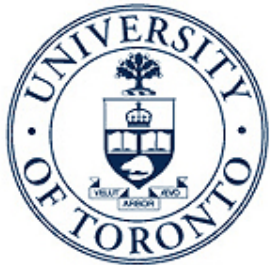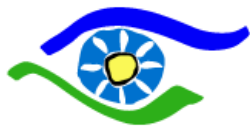

**SickKids**

 University  
Health  
Network

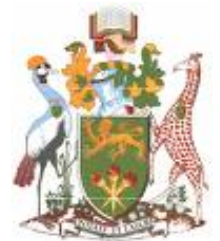

# Pop quiz!

10 questions, 5 minutes.

# Outline

1. Retinoblastoma is a Genetic Disease
2. Retinoblastoma Genetic Testing
3. Genetic Counseling for Retinoblastoma
4. Personal Stories: RB Genetics

**1. Retinoblastoma is a GENETIC disease**

# Genes make up the storybook of life

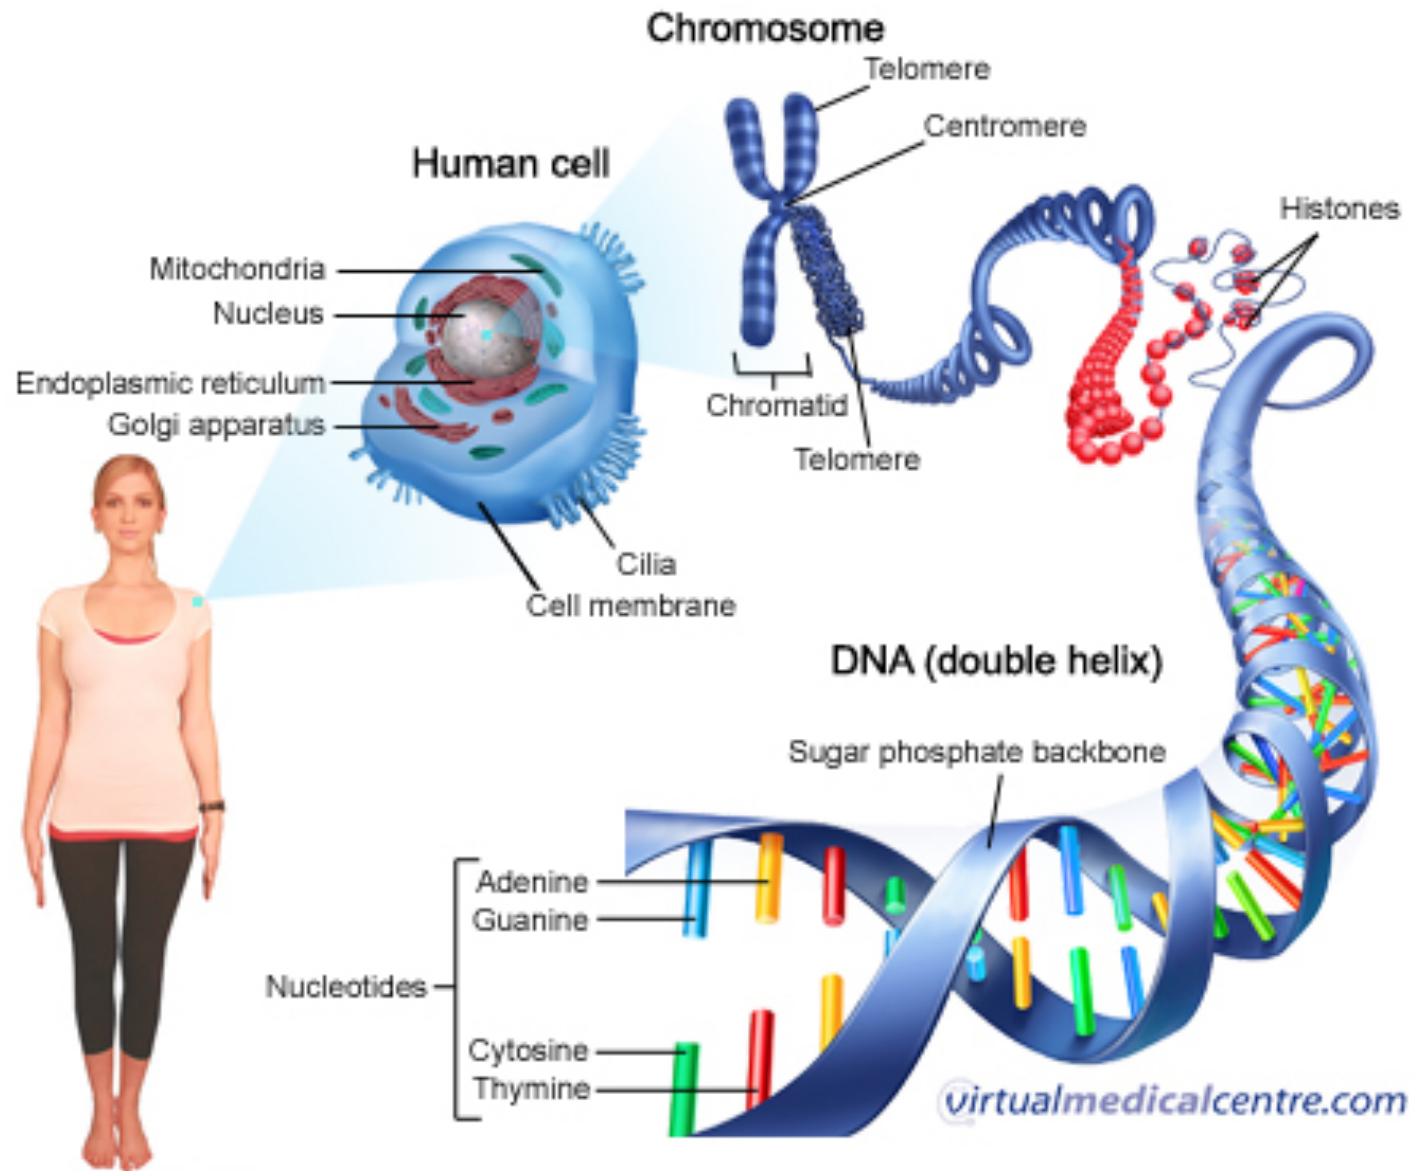

# Cancer is a disease of the genome

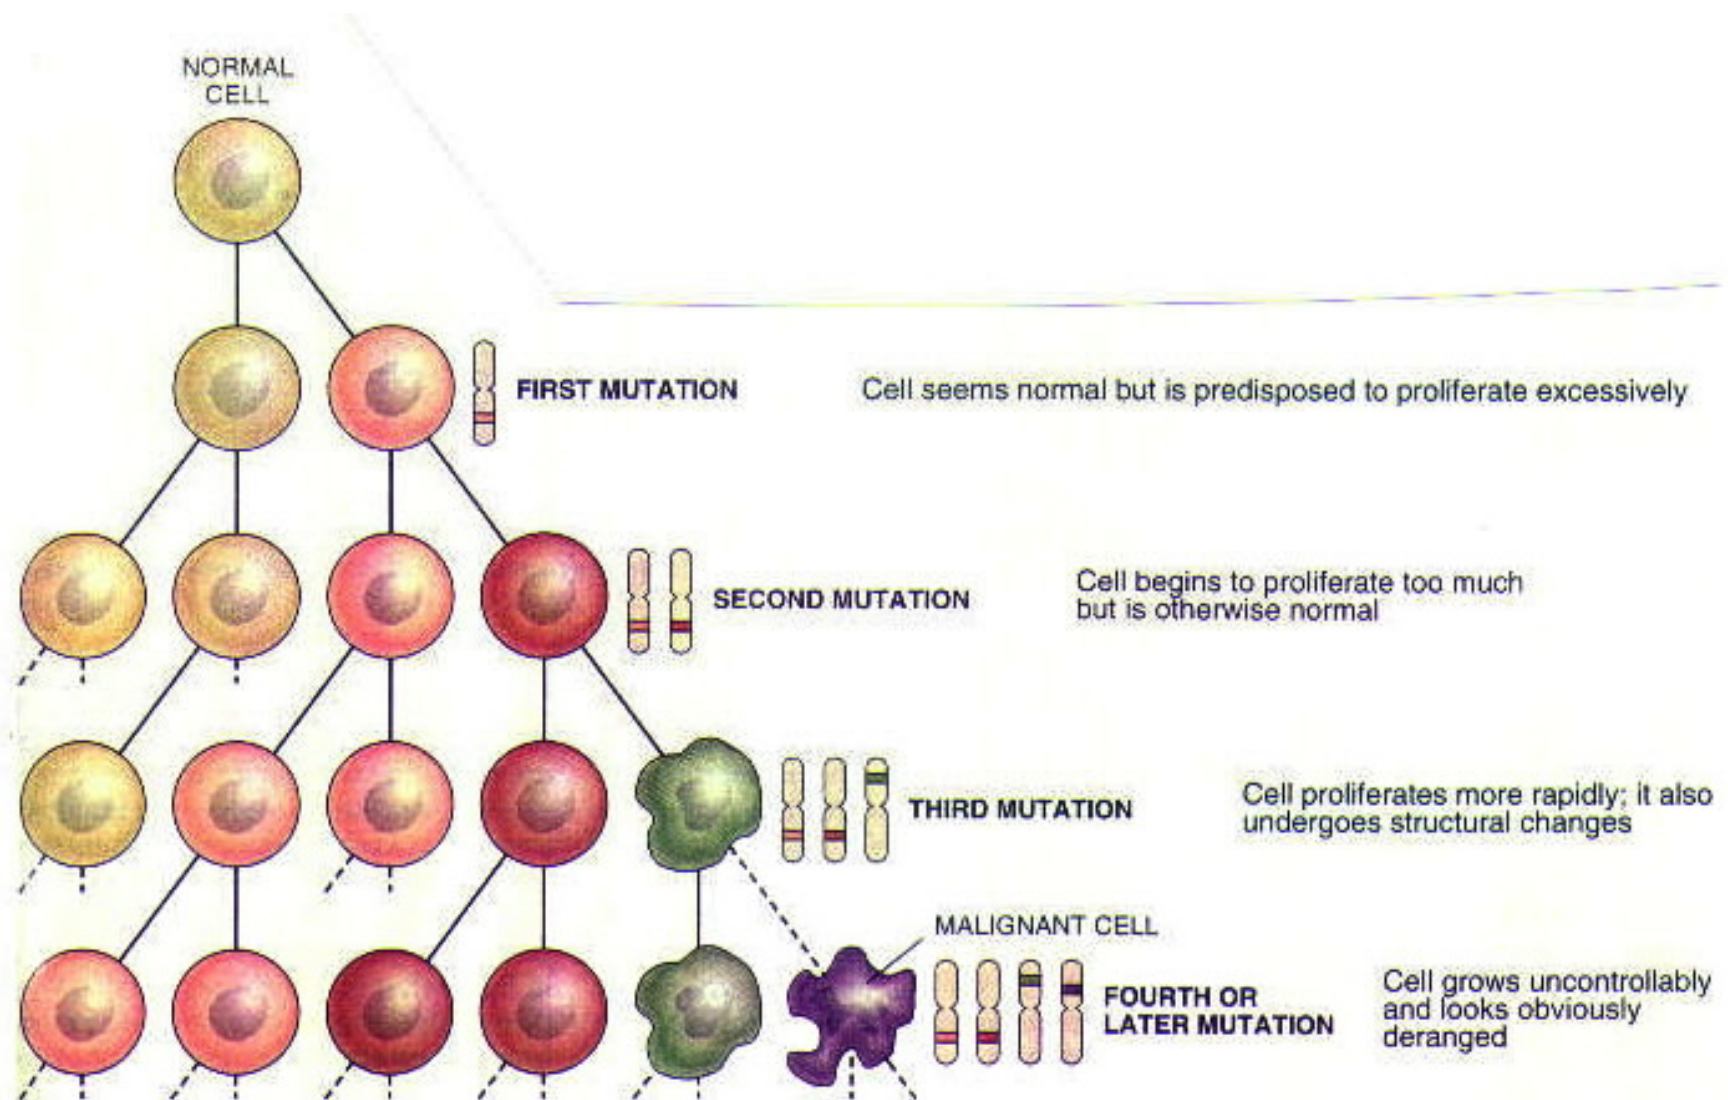

# *RB1*: The Retinoblastoma Tumor Suppressor gene

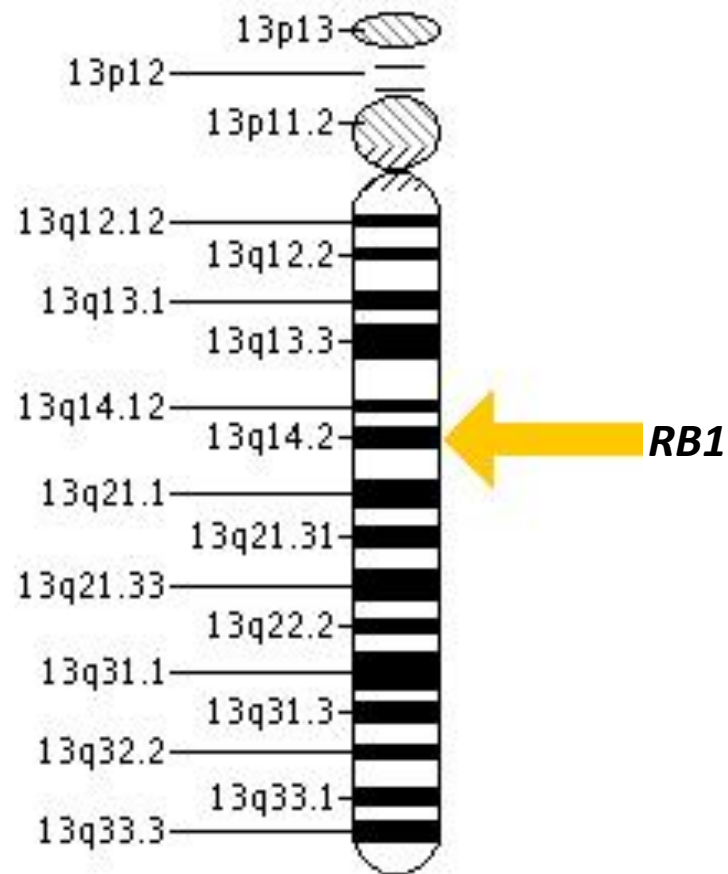

- The *RB1* gene is involved in
  - control of cell growth
  - Keeps DNA healthy
- Mutations in *RB1* initiate retinoblastoma

ALL Retinoblastoma tumours have mutations in both *RB1* copies

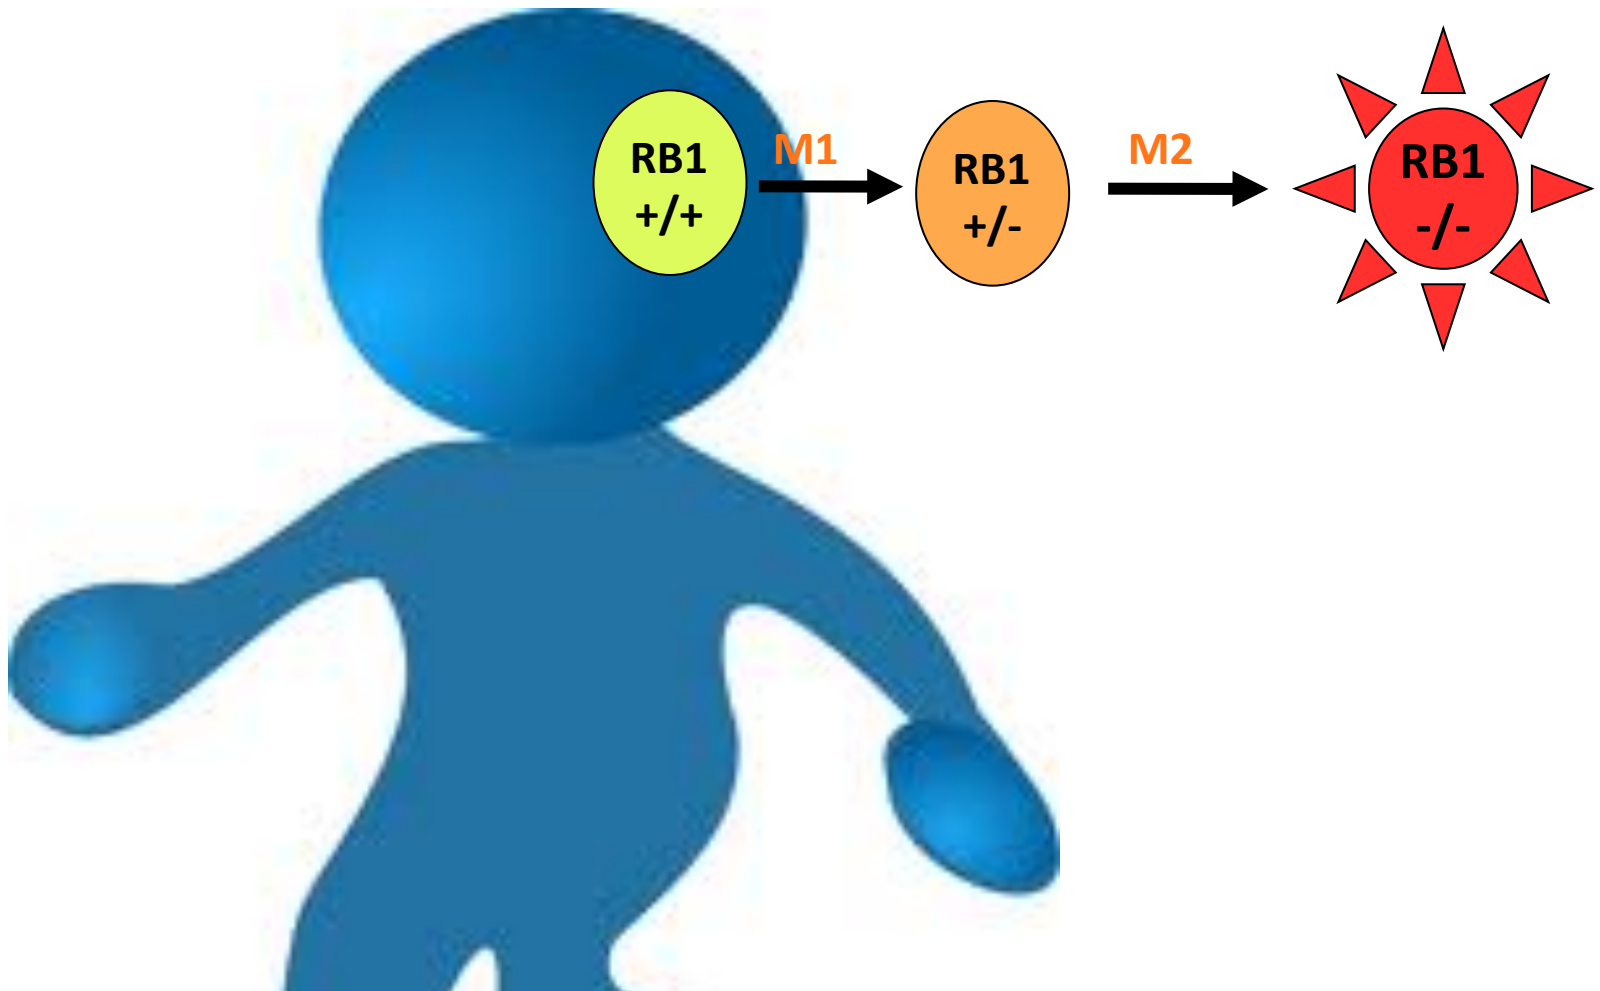



# Retinoblastoma is a Genetic Disease

***Heritable***  
*All Bilateral*  
*Some unilateral*

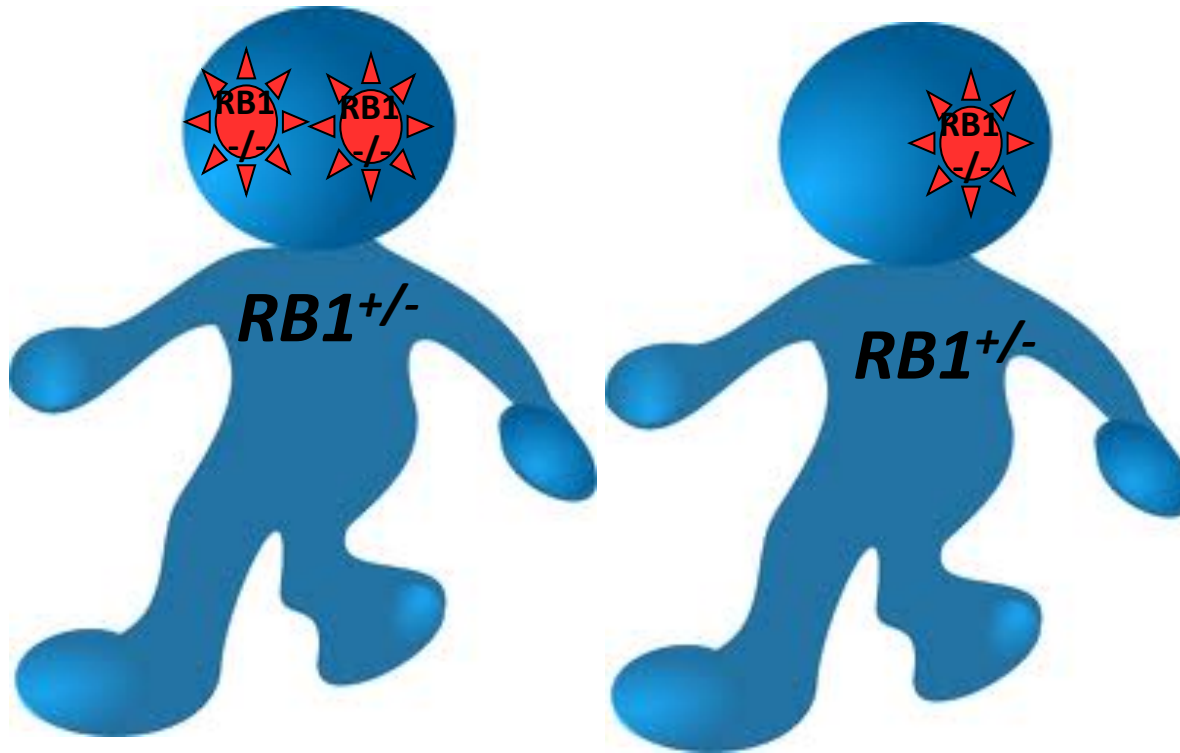

***Increased Risk for second cancer***

***Non-heritable***  
*Most Unilateral*

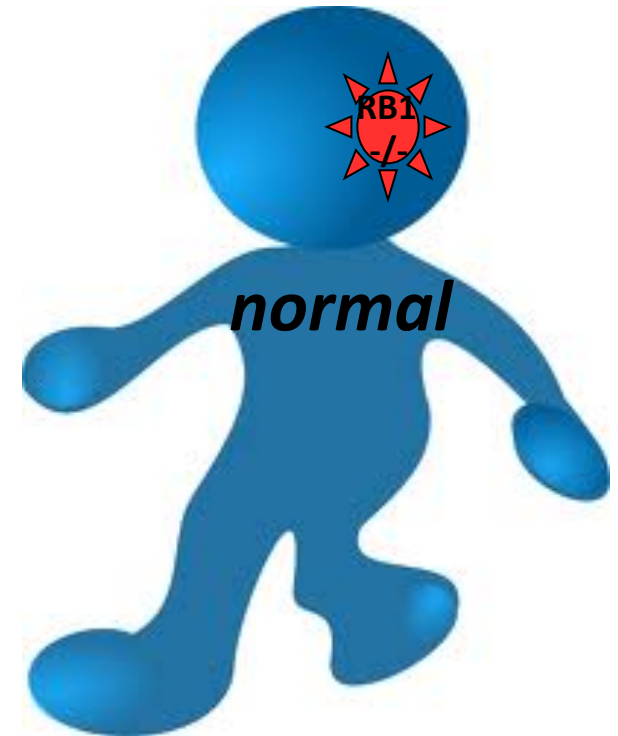

# Retinoblastoma can be caused by MYCN-amplification

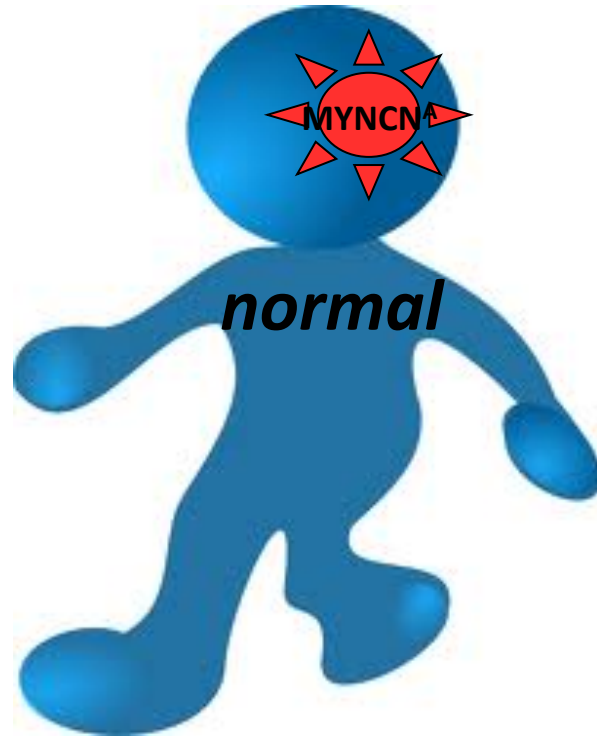

***Non-heritable***  
*Always Unilateral*  
*Young age*  
*Neuroblastoma-like pathology*

## 2. Retinoblastoma Genetic Testing

# *RB1* mutation detection is **critical** part of care

- Risk of multifocal, bilateral disease
- Risk to family members & future offspring
- Risk of second cancers
- Result useful for metastatic surveillance

-Dimaras et al., *Transl Res*, 2010

# Distribution of RB1 Germline Mutations

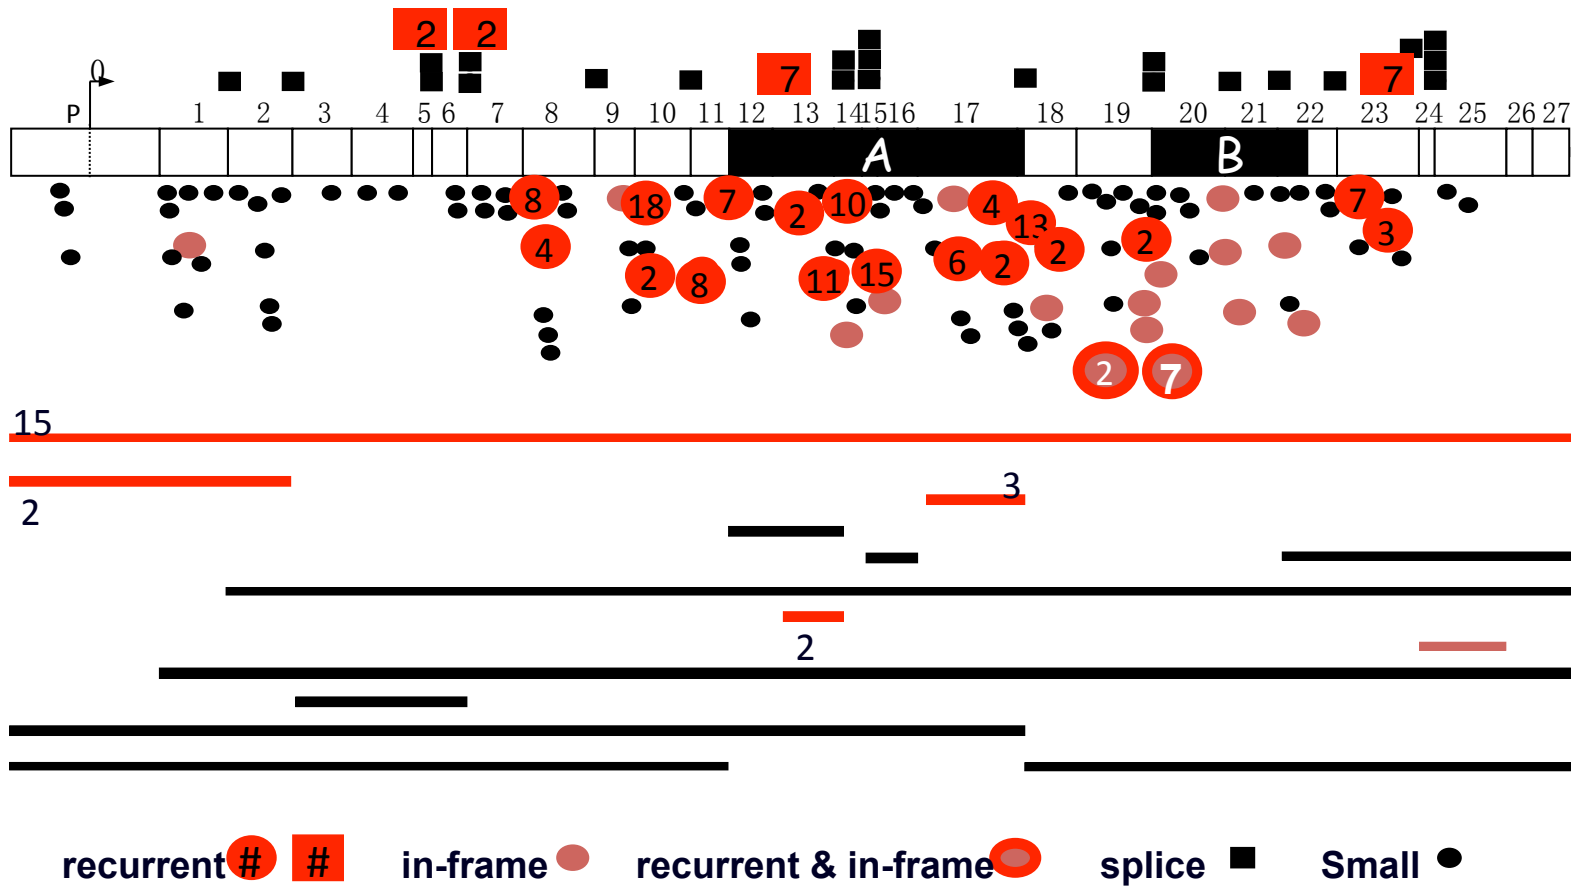

# Take Home Message

- With each new patient, we embark on an exploration to find the causative mutation
- There is no short cut.

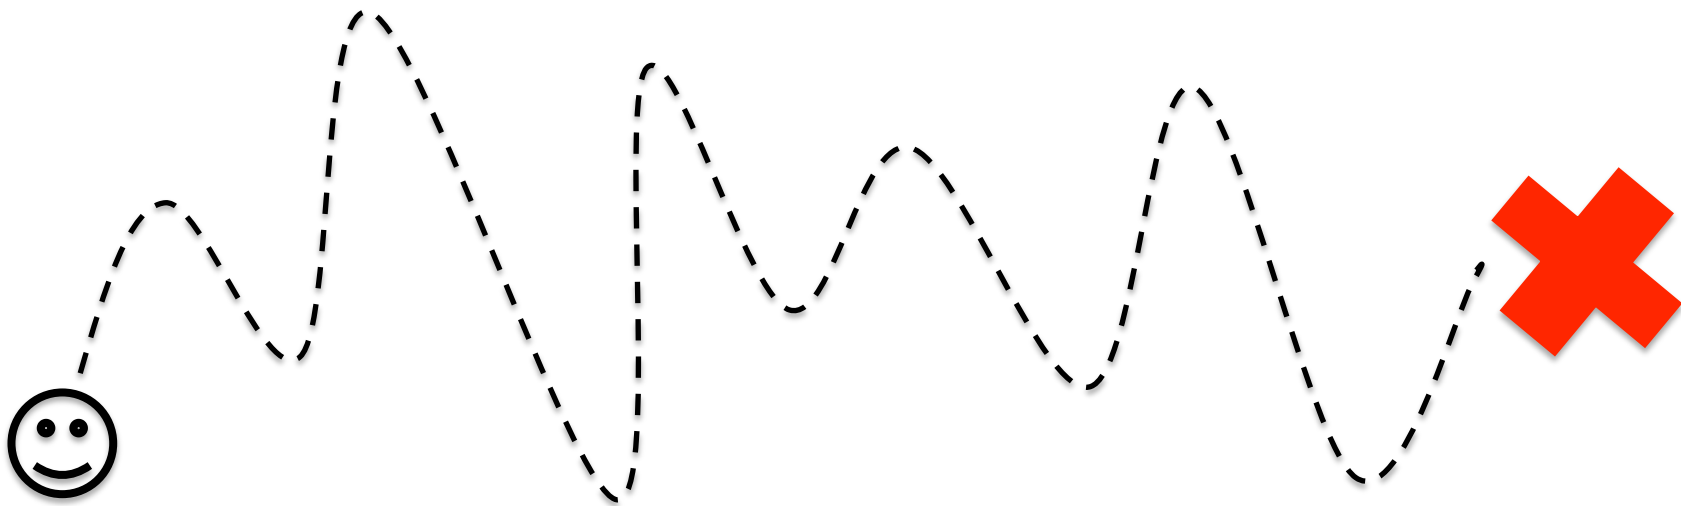

# Mutation detection in Proband

- Bilaterals: test blood

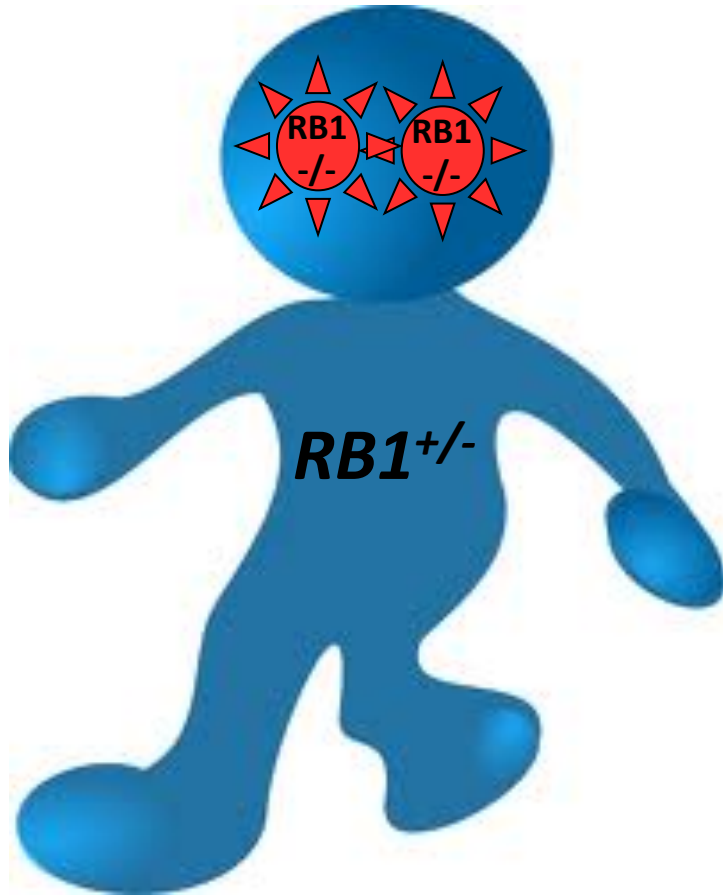

# Mutation detection in Proband

- Unilaterals:
  - test tumor to discover mutation(s)
  - then screen blood to see if the mutation is present in germline
  - If no tumor available, test blood

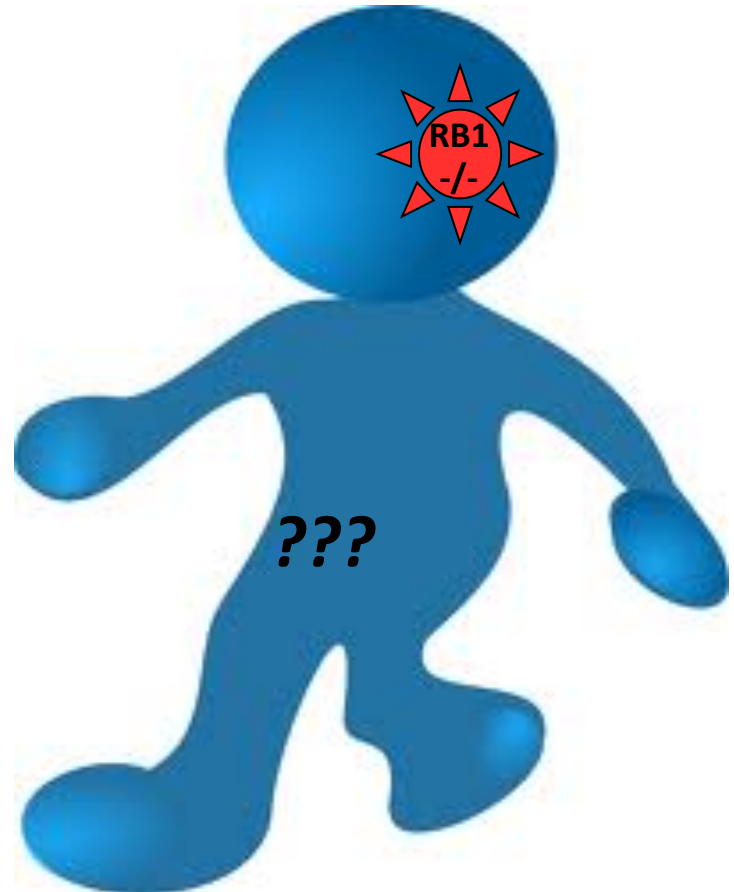



# Mosaicism

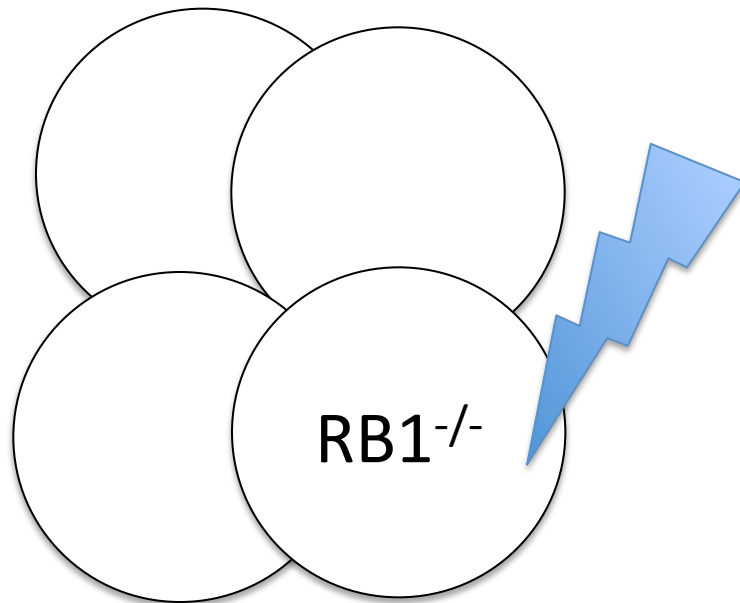

- A proportion of cells in the body carry the *RB1* mutation
- May or may not develop disease
- May or may not be heritable

# Low Penetrance RB

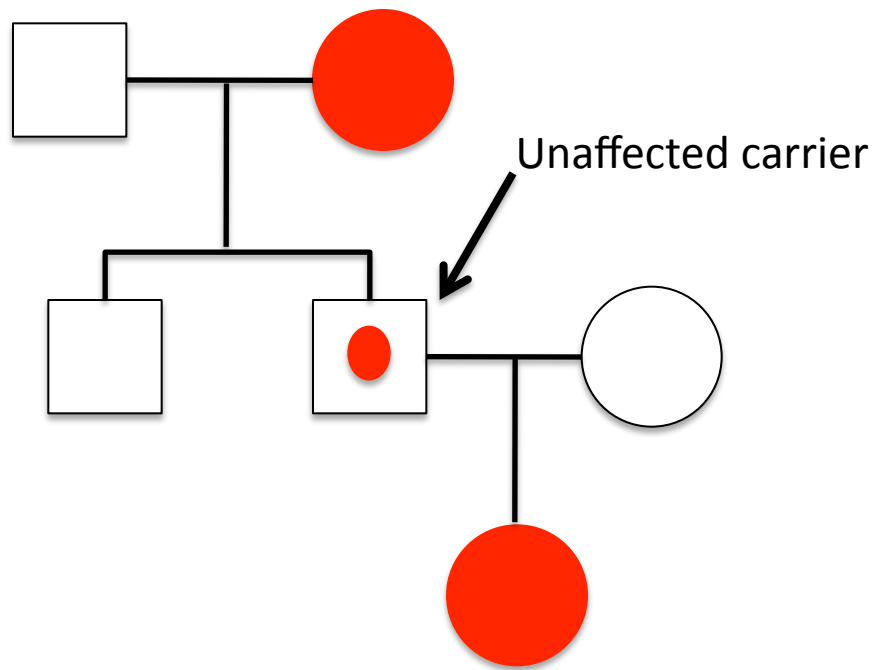

□ male

○ female

# Mutation detection in family

*11 bp deletion exon 14*

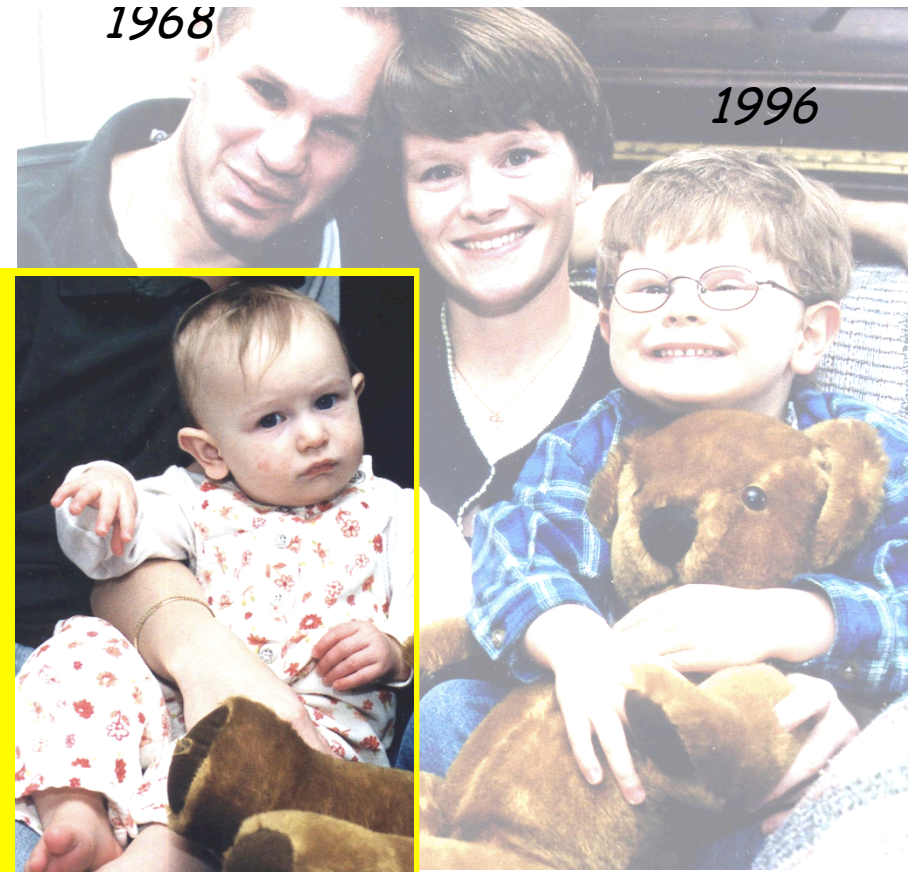

1999

Prenatal Diagnosis  
Early Delivery  
Laser/Cryo

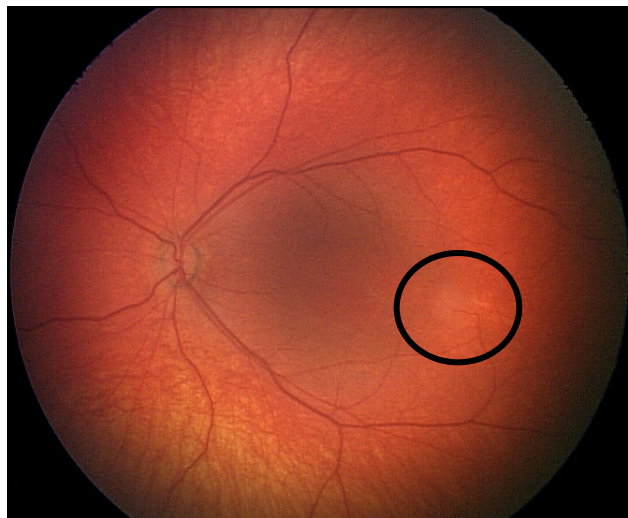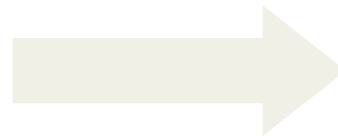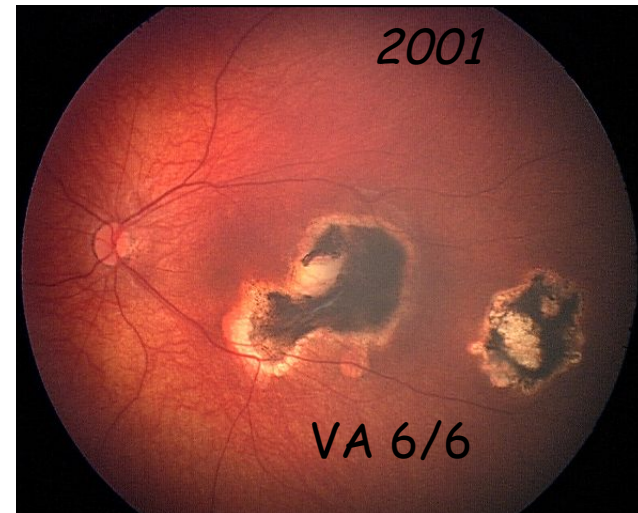

# Metastatic Surveillance

- Perform genetic surveillance for evidence of *RB1* mutation in CSF

*Non-heritable  
Unilateral*

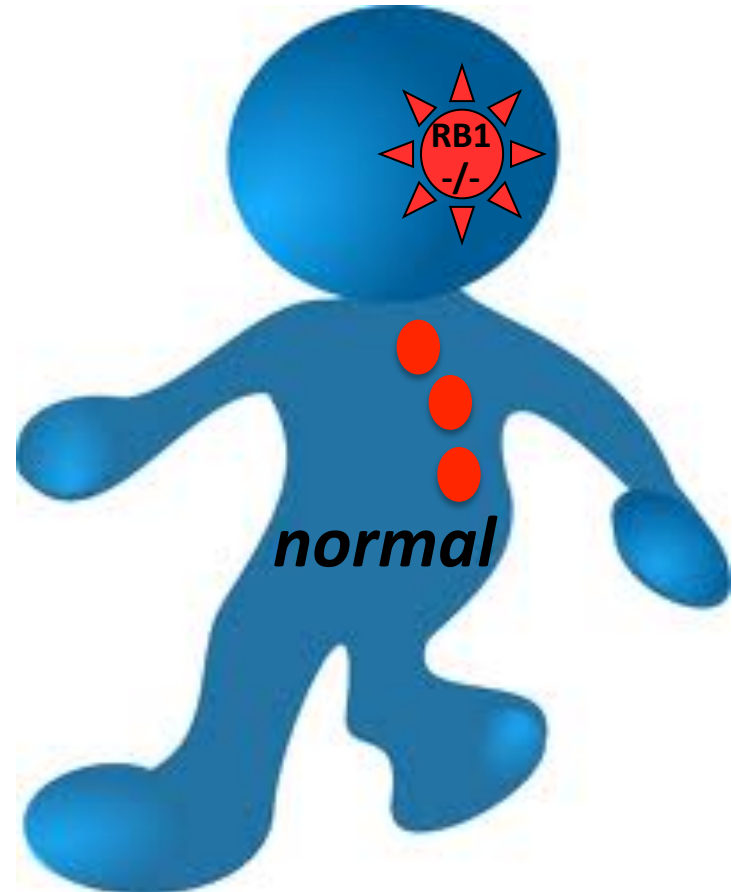

### 3. Genetic Counseling for Retinoblastoma

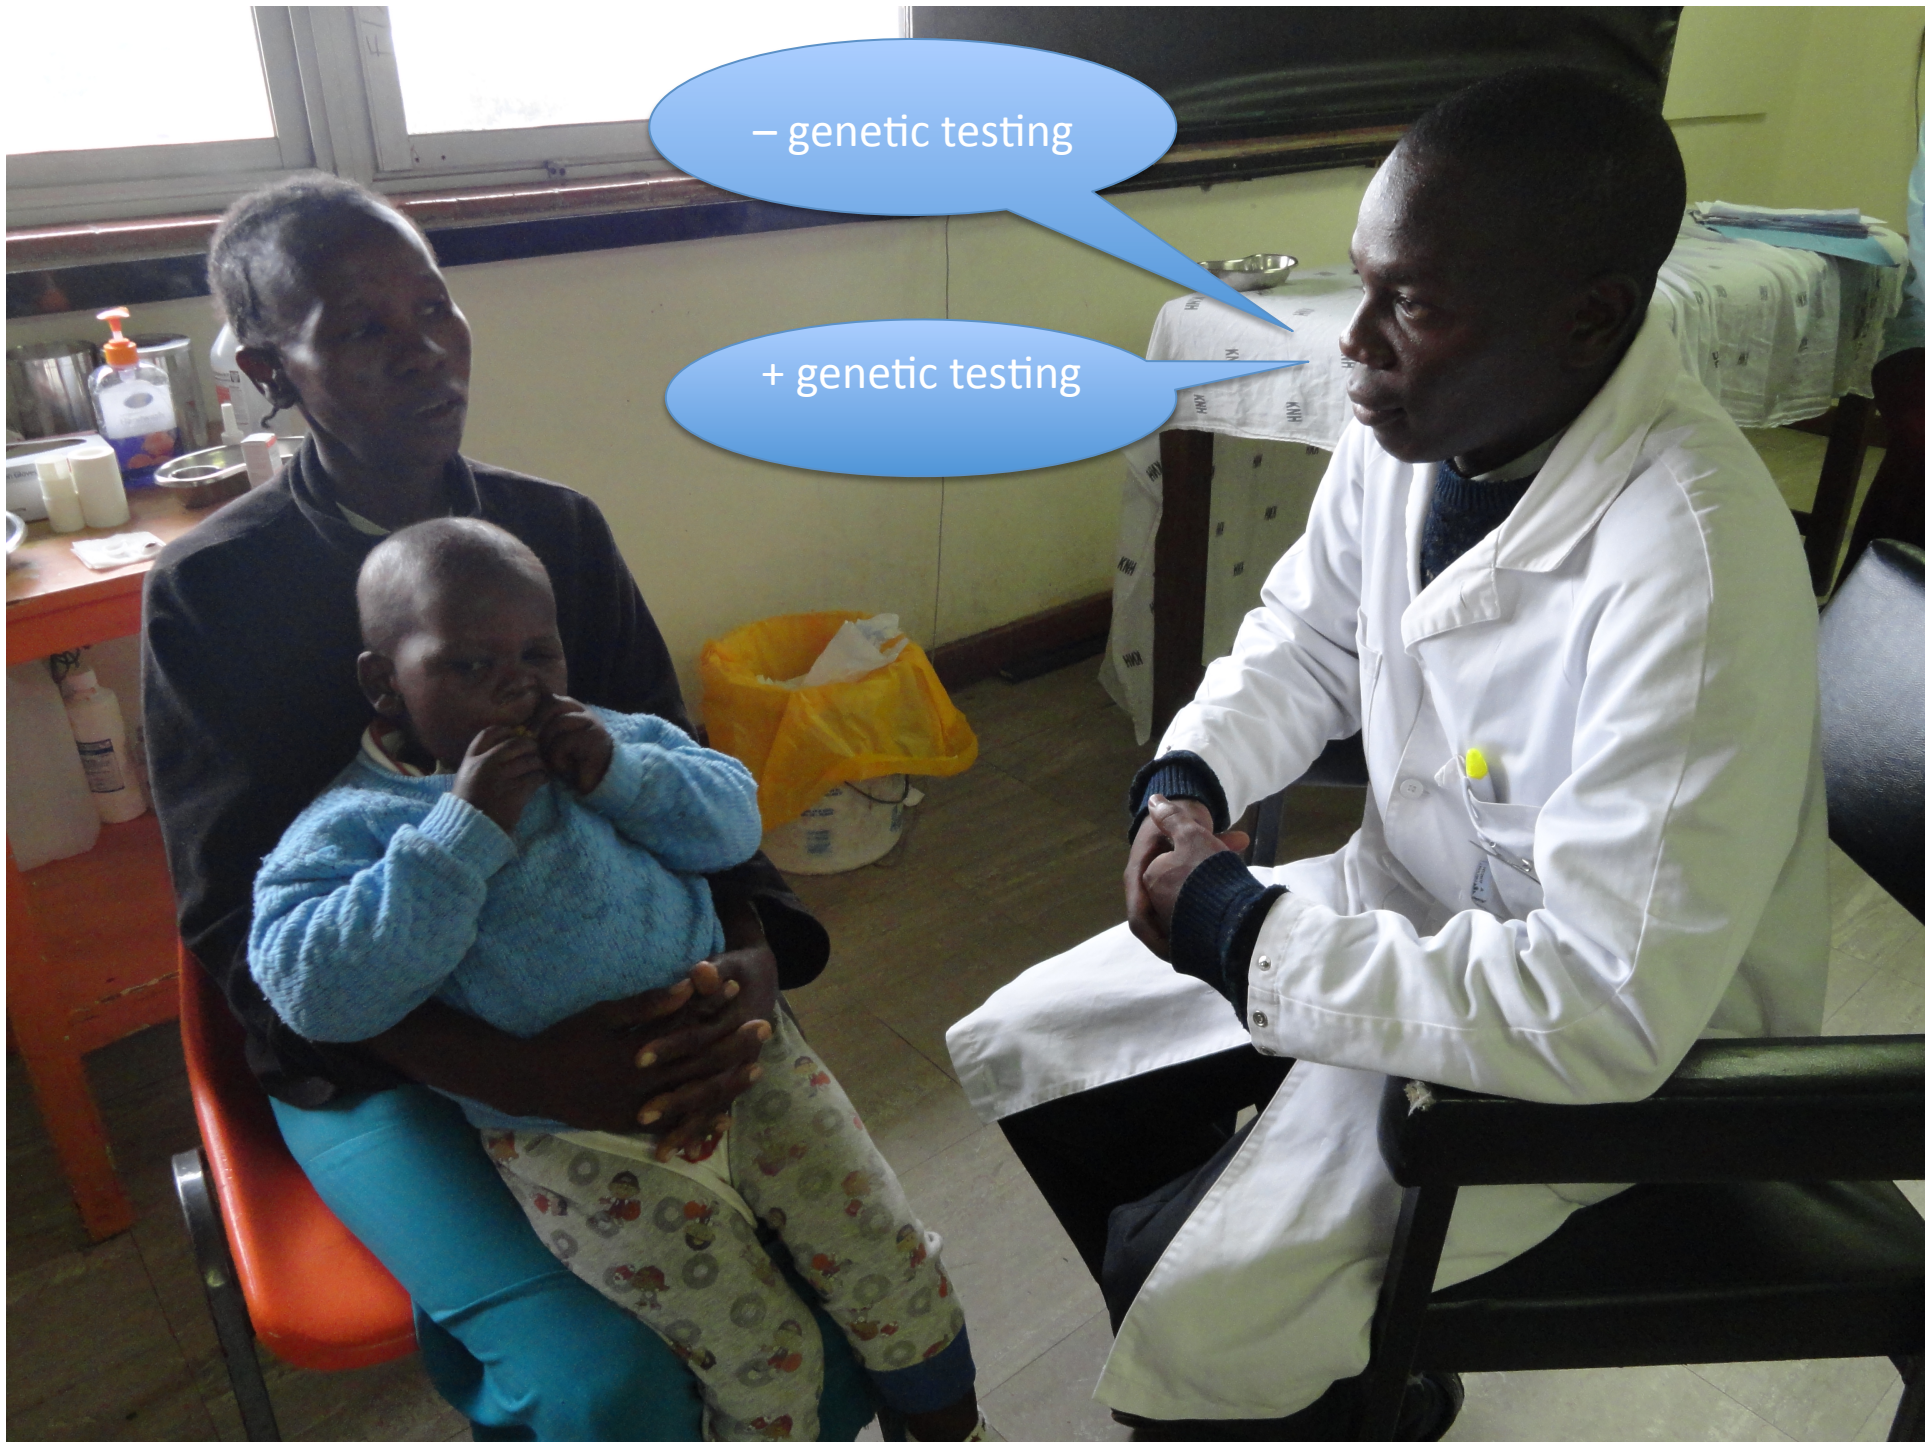

- genetic testing

+ genetic testing

# How should genetic counseling for RB take place in Kenya?

- Cultural Context
  - Feelings of guilt are common worldwide in response to genetic testing.
  - Do we understand the specific cultural response to issues of heredity?
  - How can we achieve psychosocial and family support together with genetic counseling?

# How should genetic counseling for RB take place in Kenya?

- Differences in Psychosocial needs
  - Do retinoblastoma survivors deal with risk to their child differently from unaffected parents?
- Lay fact and fiction in genetics
  - How do lay people understand genetics?
  - What creative methods can be use to communicate about ‘genetics’?



# Issues to explore in Kenya

- Physician understanding of genetics
  - Genetics only covered in medical school – no genetic counseling programs
  - What do retinoblastoma healthcare workers understand about genetics?
  - How can they be assisted to meet the needs of patients?
  - Must we train a new class of healthcare workers, to deliver genetic counseling to retinoblastoma families?
  - Is it ethical to provide complex genetic results in absence of local genetic counseling?

# Personal Stories: RB Genetics

- How did genetic testing/counseling help you make the best decisions for you and your family?
- How can genetic information best be delivered to survivors and families?

# Genetics Breakout Groups

# Instructions

- 1. READ. As a group, read through the assigned case study, which includes details of a patient and family affected by retinoblastoma.
- 2. DISCUSS. As a group, discuss the following:
  - How would you counsel these family members?
  - What are the key concepts regarding genetics and inheritance present in this case?
  - If genetic testing were available, what additional information could you learn? Would this change the message to the patient and/or patient family? Would this affect patient care?
  - What are some key issues you think should be taken into consideration when counseling patient families and retinoblastoma survivors in Kenya?
- 3. ROLE-PLAY. Act out the counseling session, assigning roles (e.g. parent, survivor, grandparents, doctor, nurse, etc.) to each group member.
- 4. PRESENT. You will have 5 minutes to showcase your presentation to the wider audience.

# Case 1

- A 14 month old child presents with leukocoria in the left eye. At the EUA the child is diagnosed with an International Intraocular Retinoblastoma Classification Group E right eye, and normal left eye. The maternal grandmother is also present at diagnosis, and you notice she wears a prosthetic eye. You ask her how she lost her eye, and she says she doesn't know. You inspect the eyes of both parents and an older sibling of the affected toddler, but their eyes appear normal.

# Case 1 Solution

Possibility 1

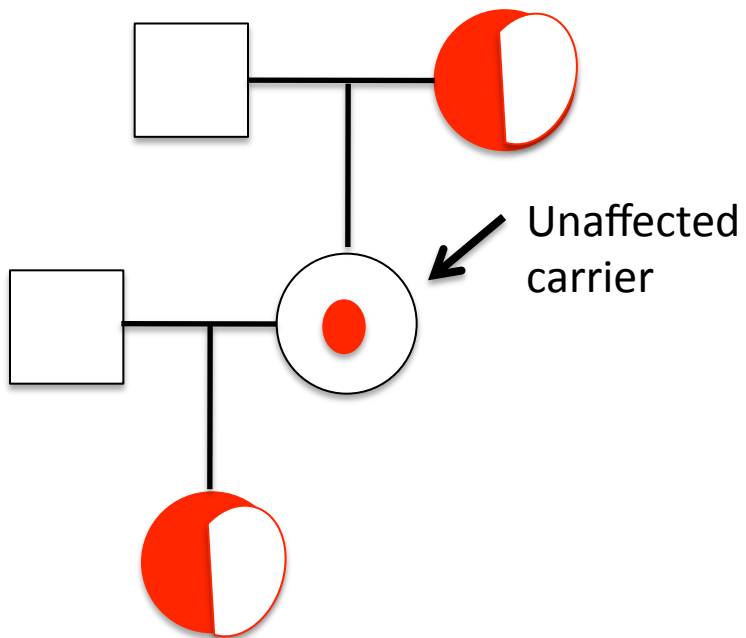

Possibility 2

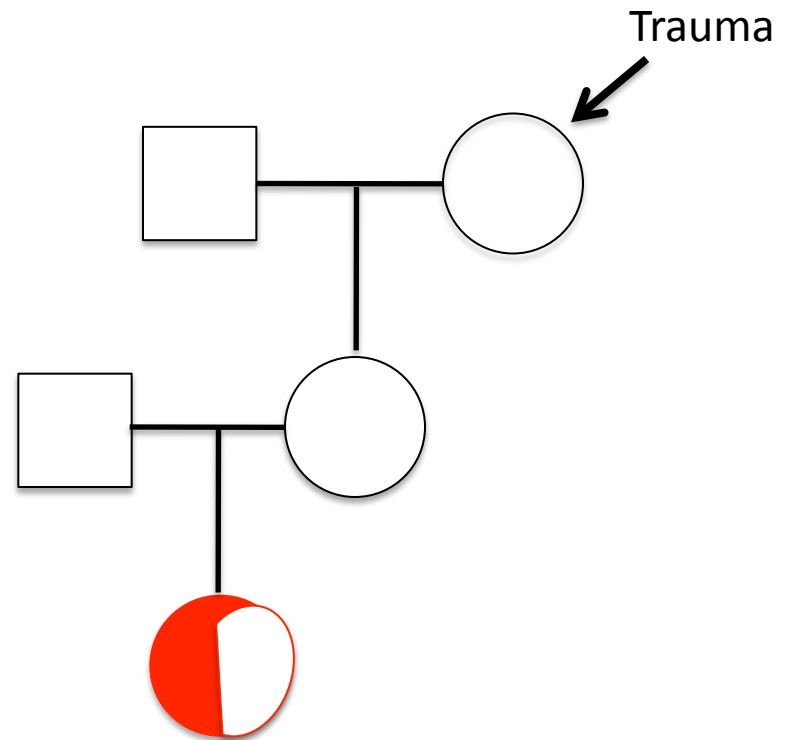

## Case 2

- You have been treating Otieno for his bilateral retinoblastoma for a year now. You determined that his right eye was International Intraocular Retinoblastoma Classification Group E and it was enucleated at diagnosis. The left eye was International Intraocular Retinoblastoma Classification Group B and treated by chemotherapy and focal therapy. Otieno's mother is now pregnant with her second child. She asks you if this baby will get retinoblastoma, and if there is anything you can do to prevent it from happening.

# Case 2 Solution

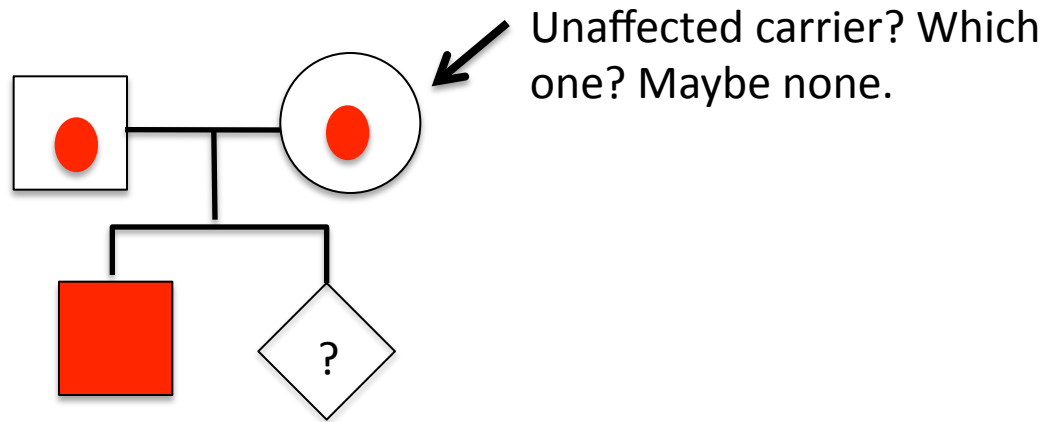



## Case 3

- A male, 22 years old, had unilateral retinoblastoma as a child. The eye was removed when he was 4 months old and he is a healthy adult today. He is now engaged to be married and is concerned about the retinoblastoma risk to his children.

# Case 3 Solution

MYCN?  
RB1-/-?

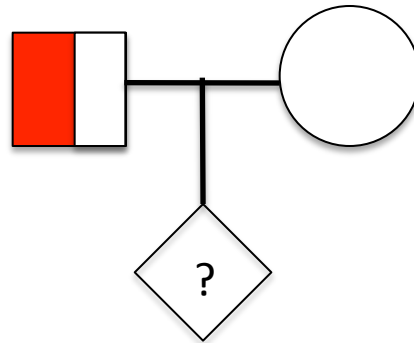

## Case 4

- One of your patients is a 20 month old child with unilateral extra-ocular retinoblastoma. The patient has a newborn sibling. The family tells you there is no family history of retinoblastoma.

# Case 4 Solution

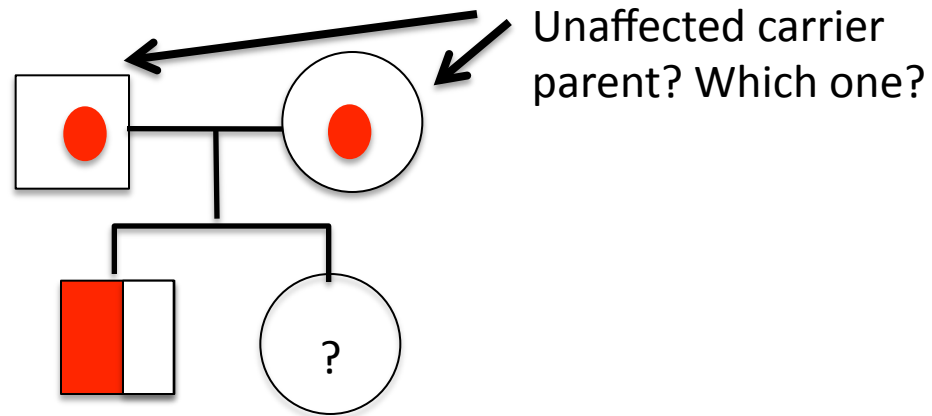

## Case 5

- One of your patients is a 20 month old child with unilateral extraocular retinoblastoma. The patient has a newborn sibling. The family tells you they had two older children who died from retinoblastoma.

# Case 5 Solution

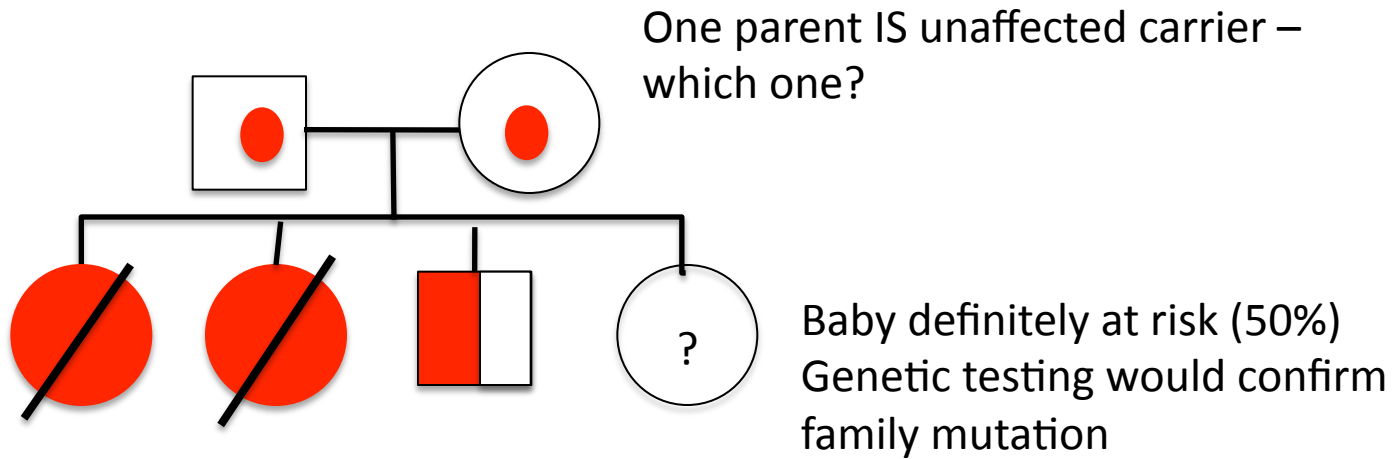

Supplement: pone.0129852.s002.pdf [file pone.0129852.s002.pdf]
